# Supplementary material for: Introducing a New Breed of Wine Yeast: Interspecific Hybridisation between a Commercial Saccharomyces cerevisiae Wine Yeast and Saccharomyces mikatae
Source: PubMed Central journal article supplement (PMC3629166; doi:10.1371/journal.pone.0062053), 2013-04-17

# Supporting Figure S1a

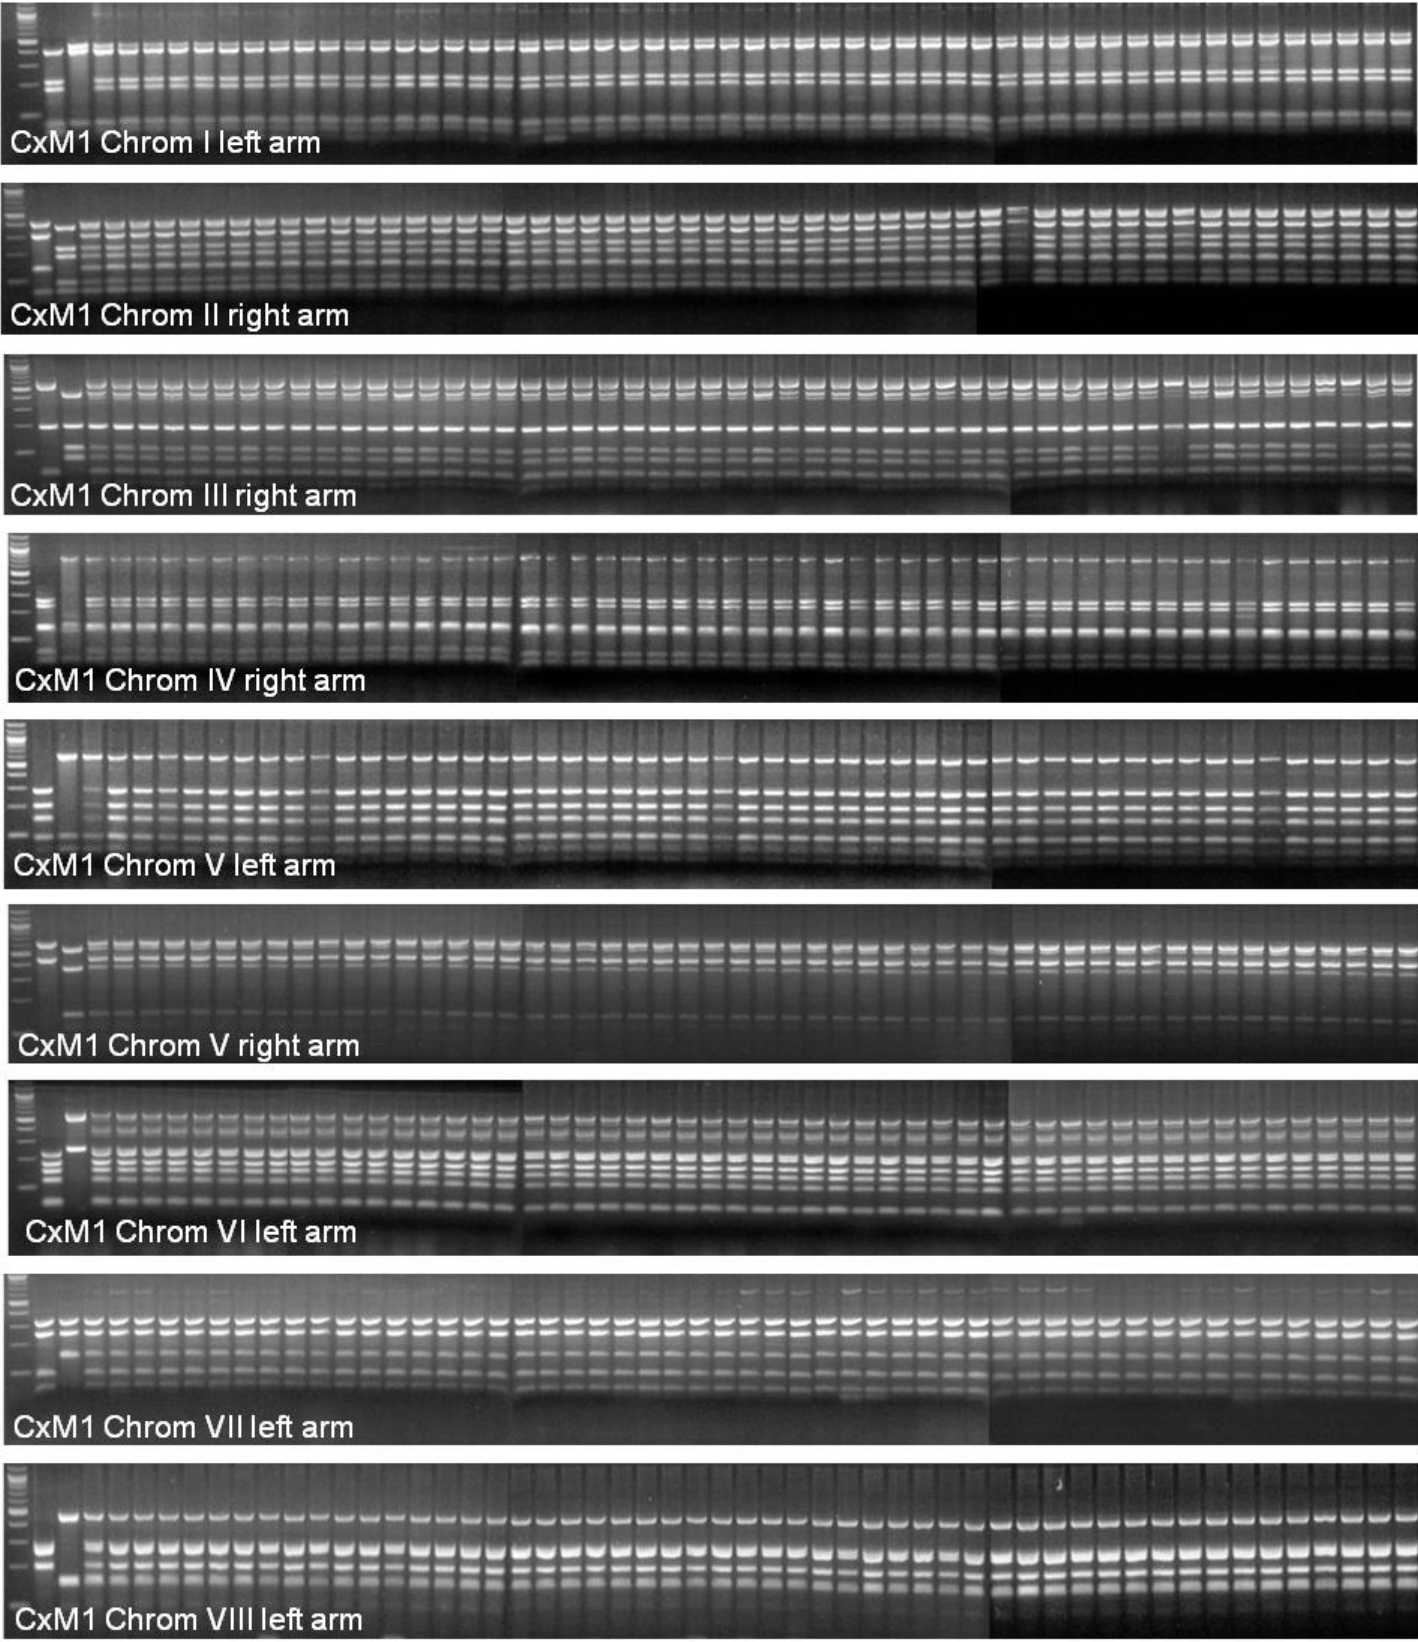

# Supporting Figure S1b

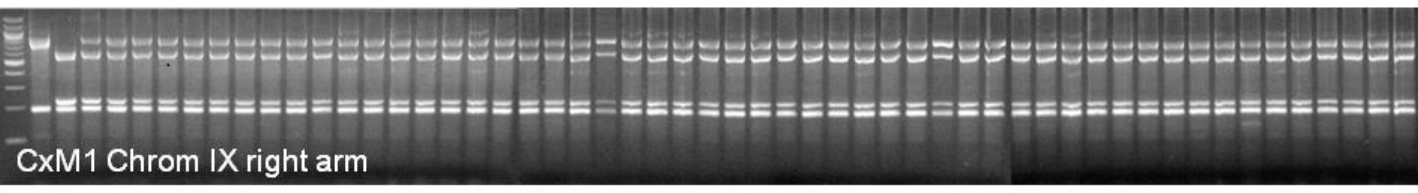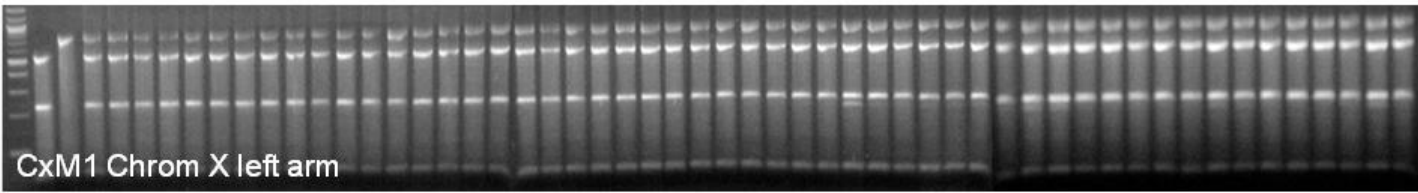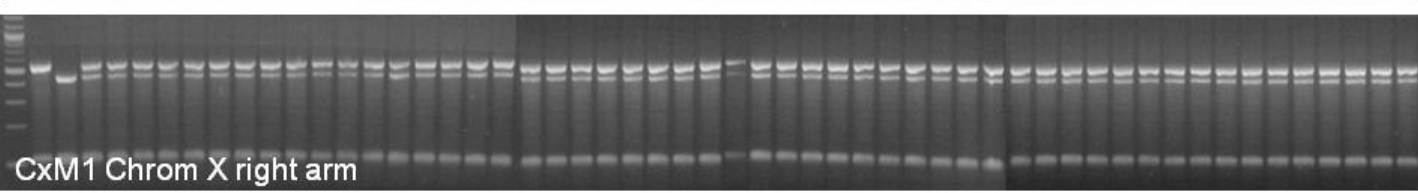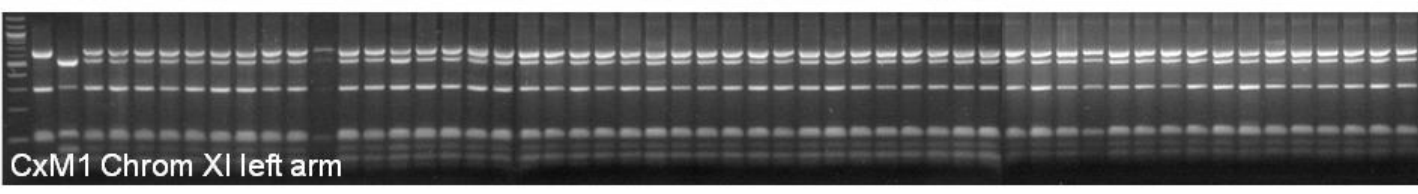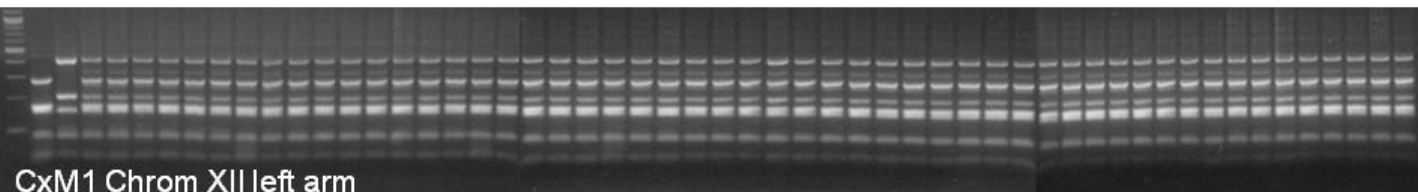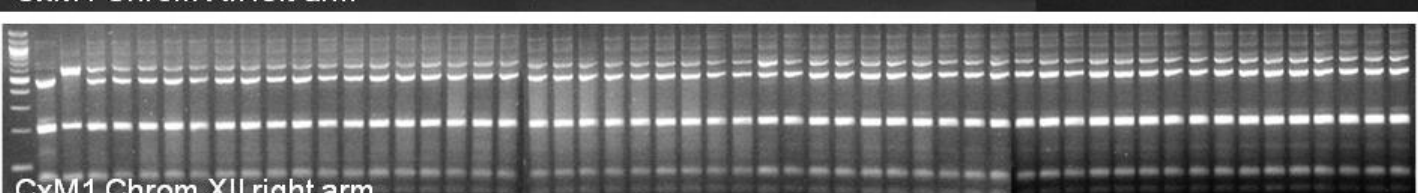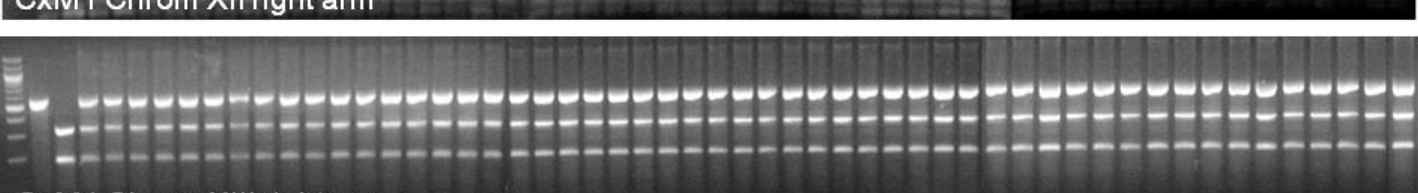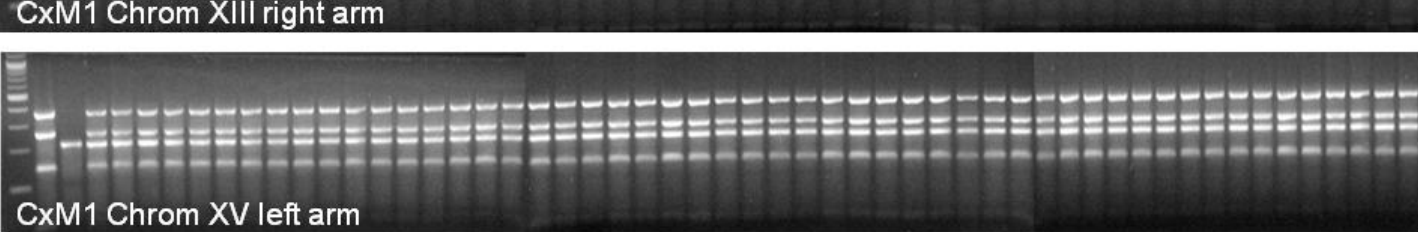

# Supporting Figure S1c

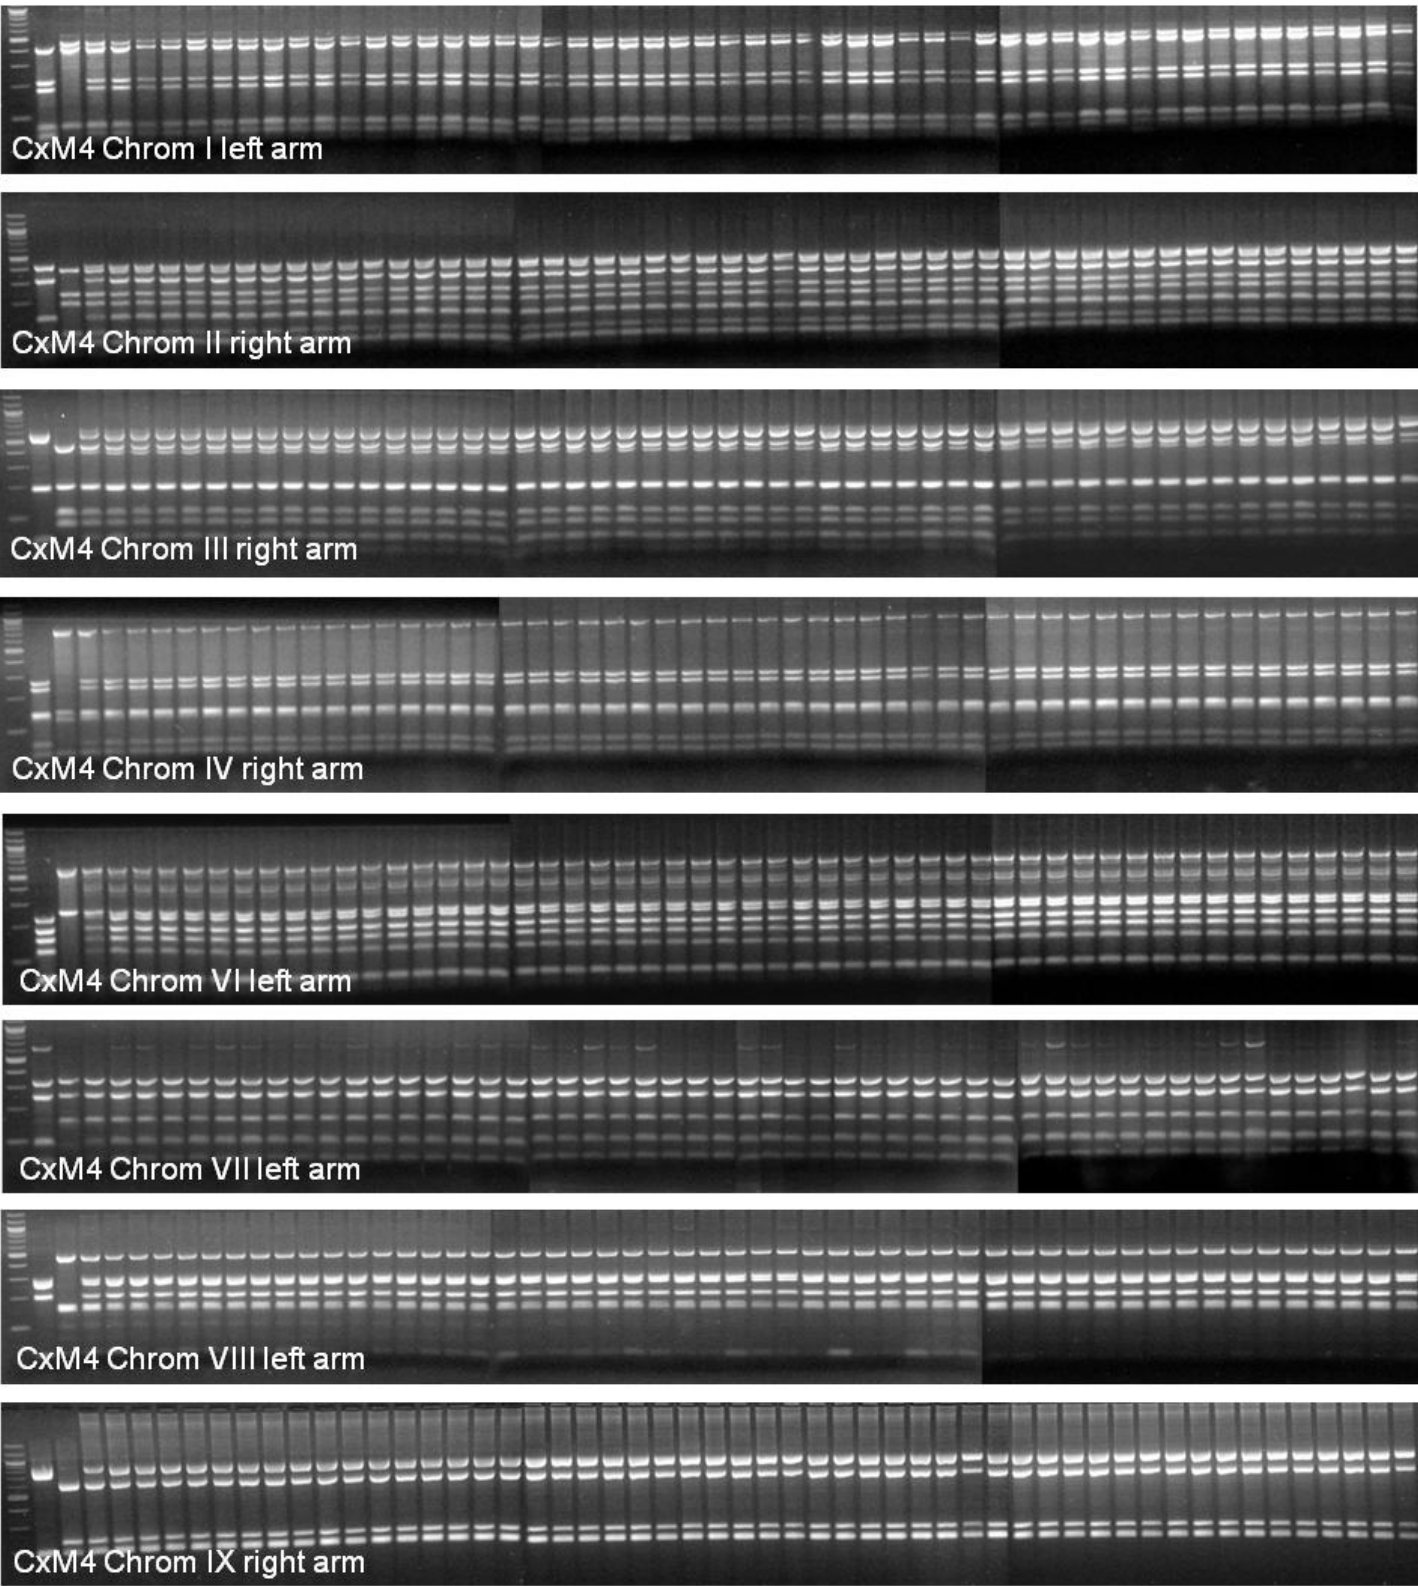

Supporting Figure S1d

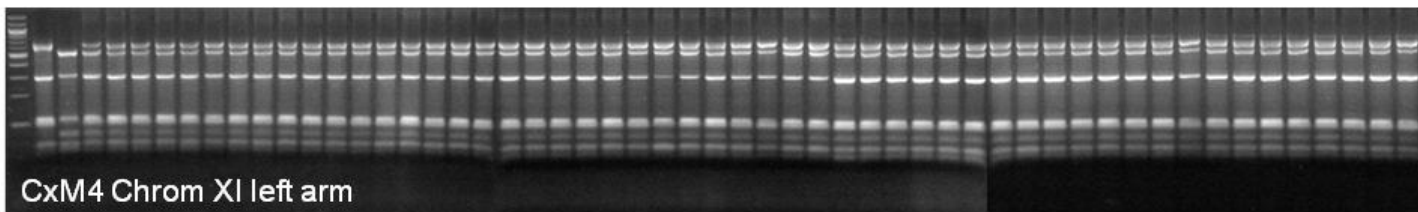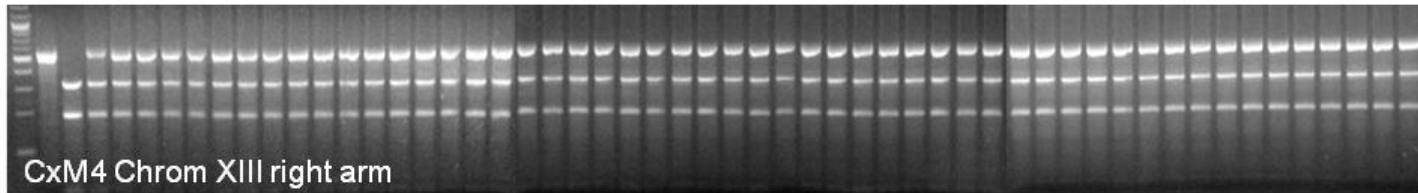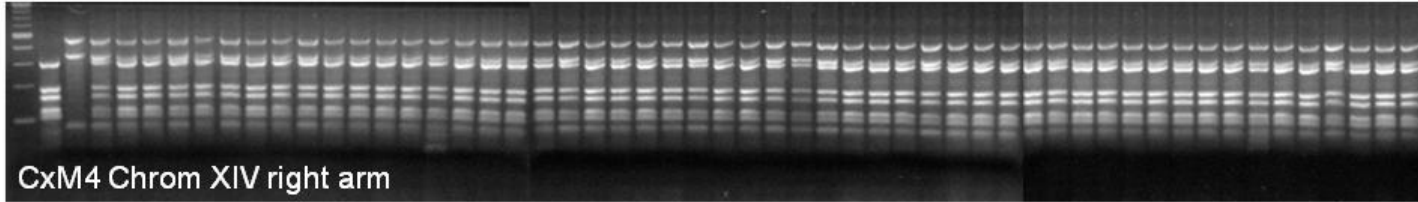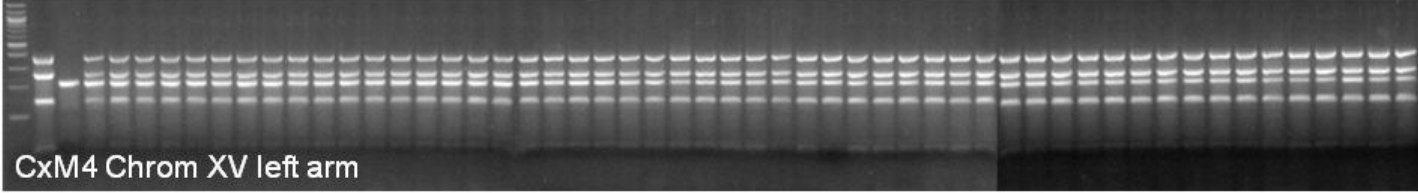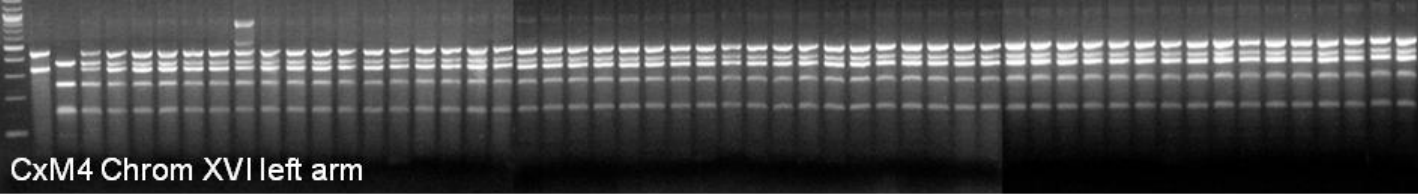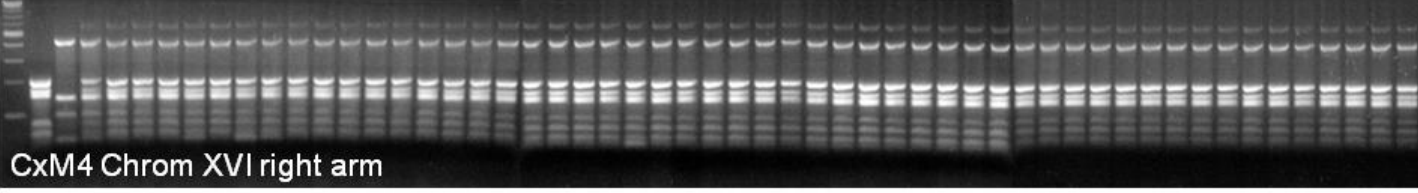

Supplement: pone.0062053.s001.pdf [file pone.0062053.s001.pdf]
