# Supplementary material for: Introducing a New Breed of Wine Yeast: Interspecific Hybridisation between a Commercial Saccharomyces cerevisiae Wine Yeast and Saccharomyces mikatae
Source: PubMed Central journal article supplement (PMC3629166; doi:10.1371/journal.pone.0062053), 2013-04-17

Supporting Figure S3a

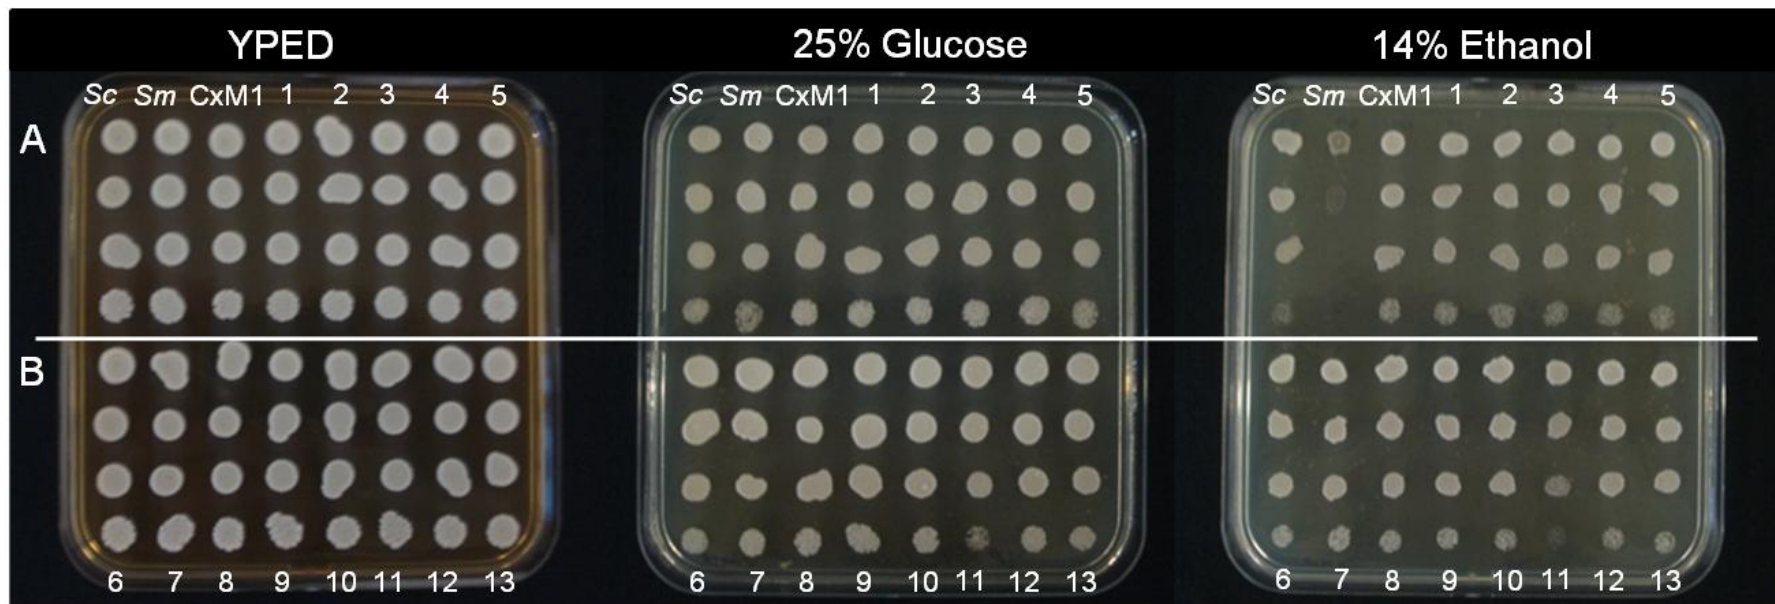

Supporting Figure S3b

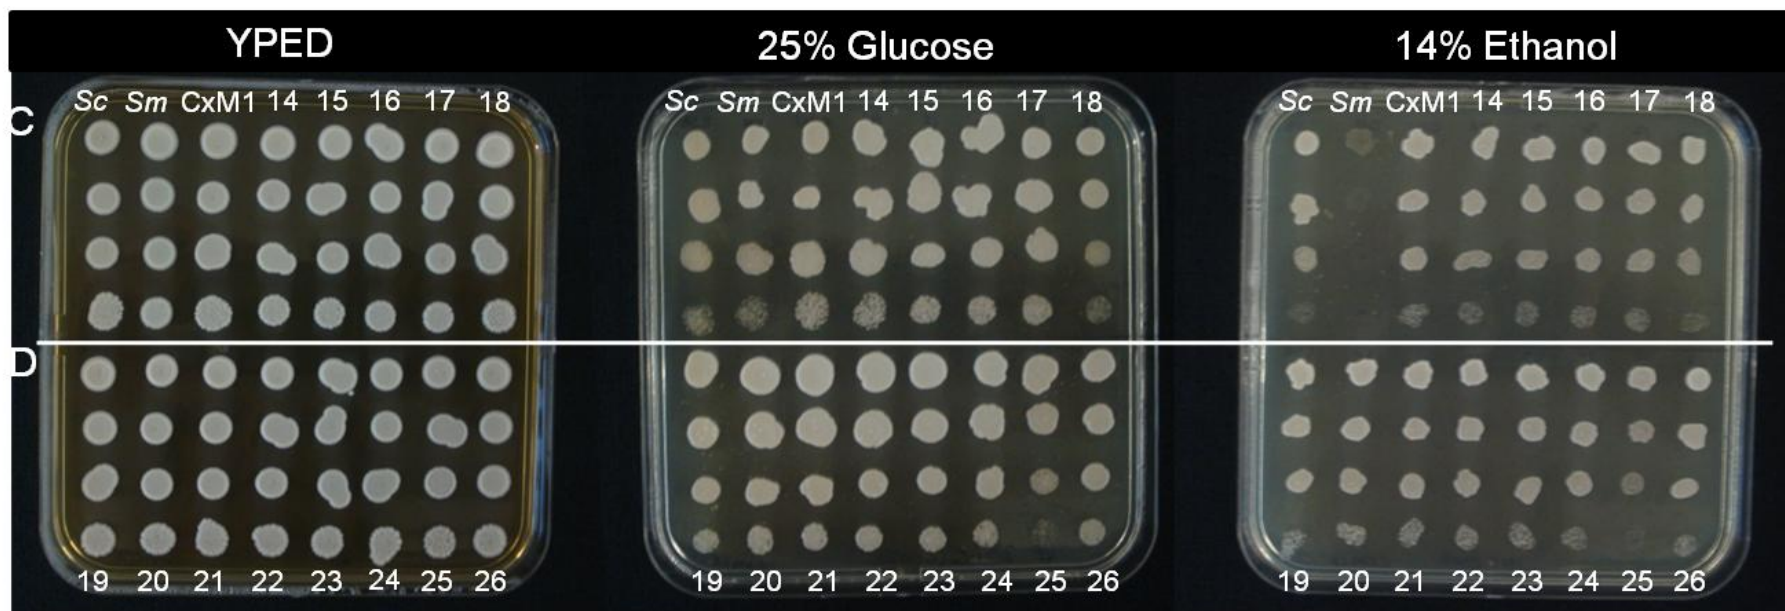

Supporting Figure S3c

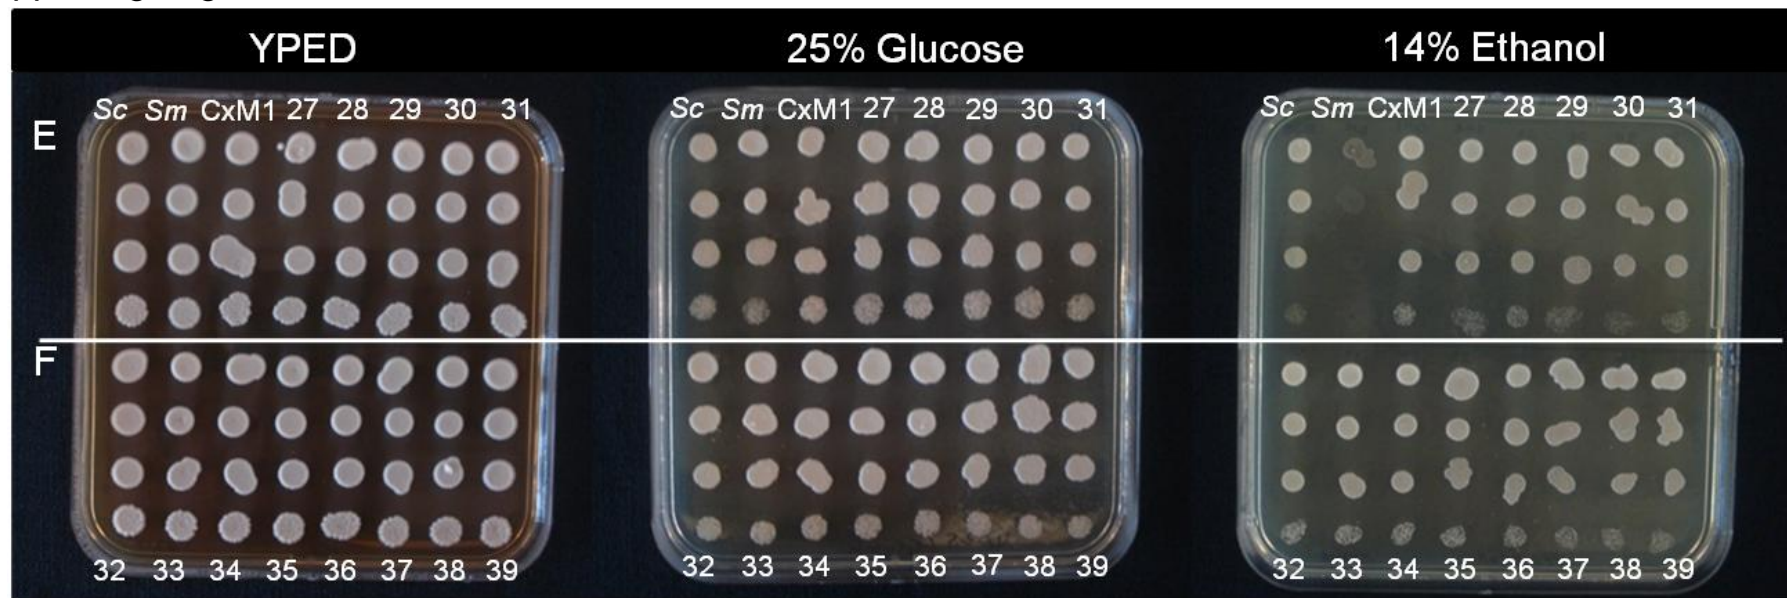

Supporting Figure S3d

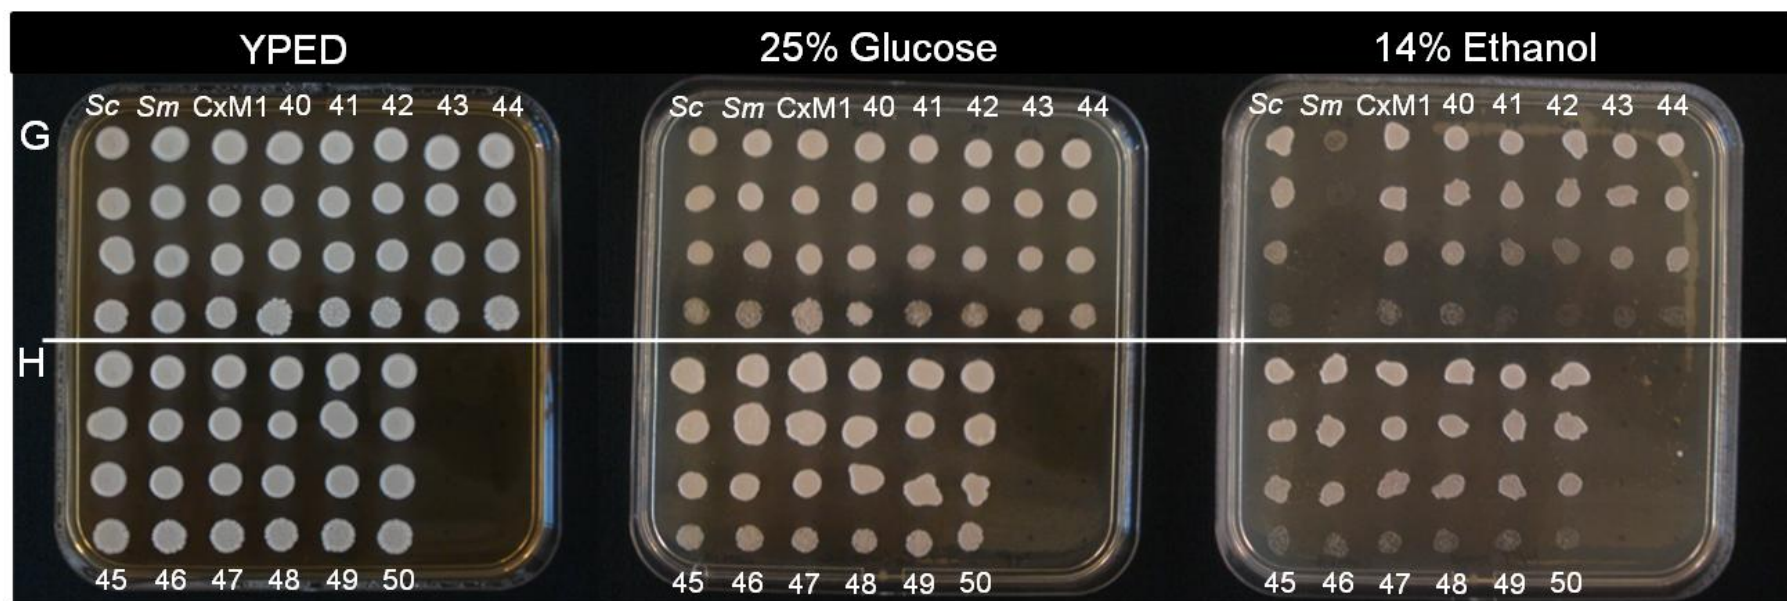

Supplement: pone.0062053.s003.pdf [file pone.0062053.s003.pdf]
